# Supplementary material for: Ultrahigh Li-ion conductive single-ion polymer electrolyte containing fluorinated polysulfonamide for quasi-solid-state Li-ion batteries
Source: Royal Society of Chemistry journal article supplement (doi:10.1039/c9ta08795h), 2019-01-01
Supplement: c9ta08795h1.pdf [file c9ta08795h1.pdf]

# Ultrahigh Li-ion Conductive Single-ion Polymer Electrolyte Containing Fluorinated Polysulfonamide for Quasi-solid-state Li-ion Batteries

Yunyun Zhong,<sup>a†</sup> Lei Zhong,<sup>a†</sup> Shuanjin Wang,<sup>a</sup> Jiaxiang Qin,<sup>a,d</sup> Dongmei Han,<sup>b</sup> Shan Ren,<sup>a</sup> Min Xiao,<sup>\*a</sup>  
Luyi Sun,<sup>c</sup> Yuezhong Meng<sup>\*a</sup>

*a. The Key Laboratory of Low-carbon Chemistry & Energy Conservation of Guangdong Province/State Key Laboratory of Optoelectronic Materials and Technologies, School of Materials Science and Engineering, Sun Yat-sen University, Guangzhou 510275, P. R. China.*

*b. School of Chemical Engineering and Technology, Sun Yat-sen University, Zhuhai 519082, P. R. China.*

*c. Polymer Program, Institute of Materials Science and Department of Chemical & Biomolecular Engineering, University of Connecticut, Storrs, Connecticut 06269, United States.*

*d. State Key Laboratory of Environmental Adaptability for Industrial Products, China National Electric Apparatus Research Institute, Guangzhou, 510663, P. R. China.*

*\*E-mail: mengyzh@mail.sysu.edu.cn (Yuezhong Meng)*

*\*E-mail: stsxm@mail.sysu.edu.cn (Min Xiao)*

<sup>†</sup> Y. Y. Zhong and L. Zhong contributed equally to this work.

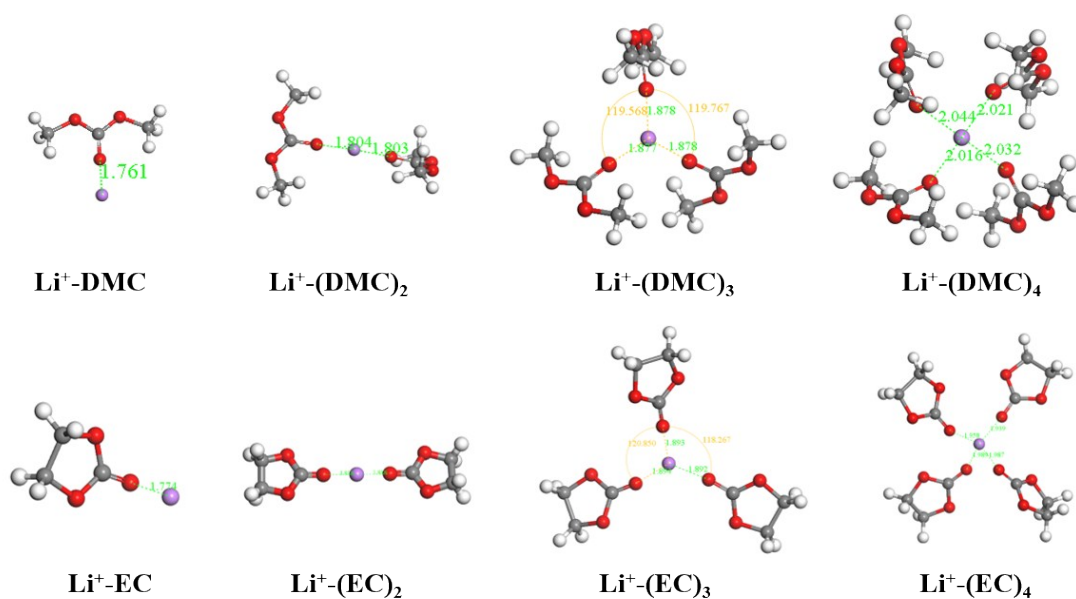

Fig. S1 Optimized geometries of the Li<sup>+</sup>-DMC and Li<sup>+</sup>-EC complex from GGA-PBE calculations. Purple spheres represent Li, red-O, white-H, grey-C.

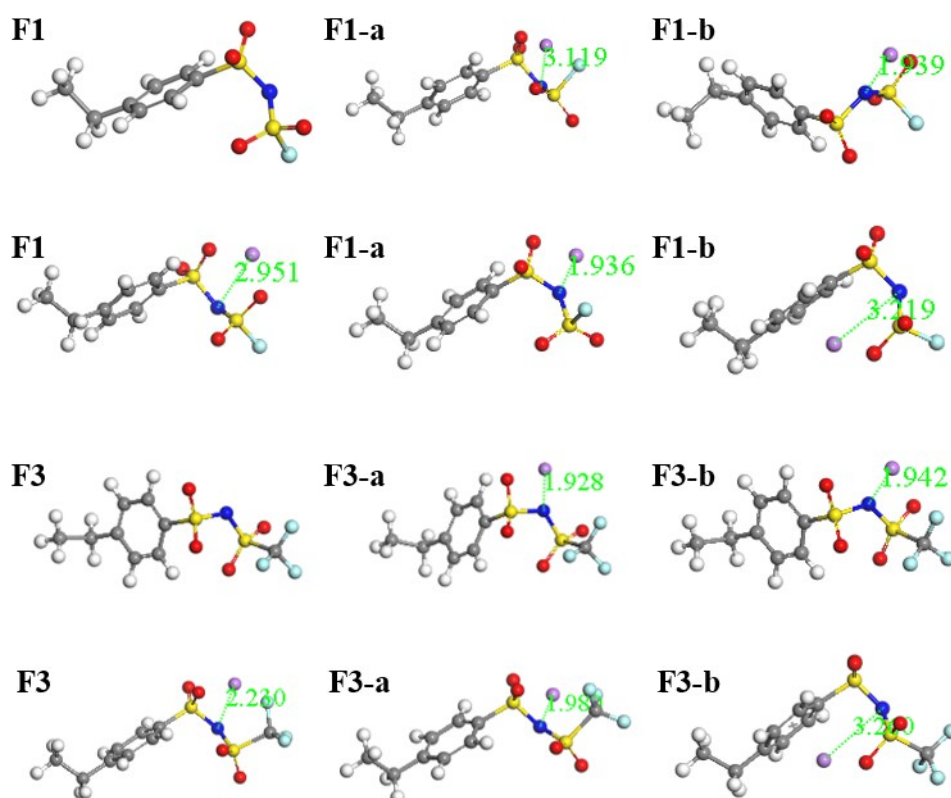

Fig. S2 Interaction types between Li<sup>+</sup> and the anions of LiSFSI (F1) and LiTFSI (F3). Blue spheres represent N, yellow-S, cyan-F, red-O, white-H, grey-C.

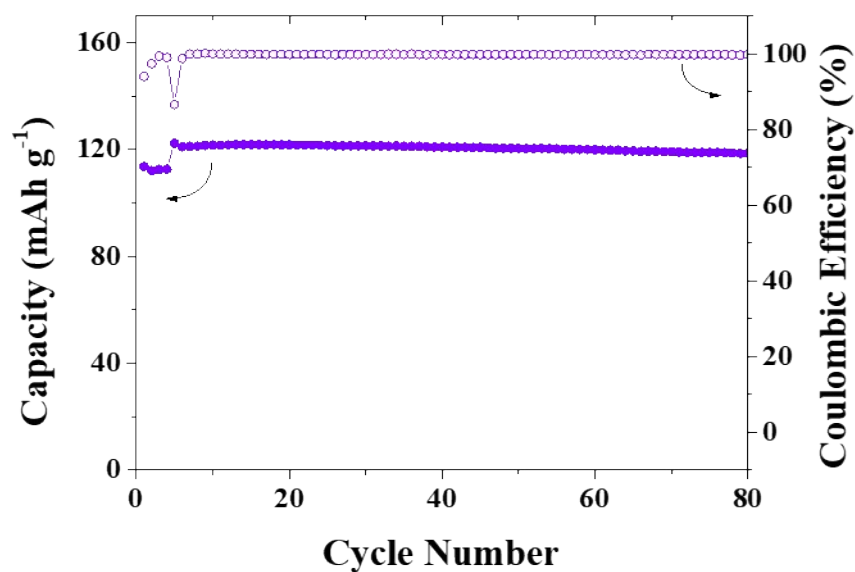

Fig. S3 Cycle performance of Li|LFPP-4/2/1@PVDF SIPE|LFP batteries at 1.0 C.

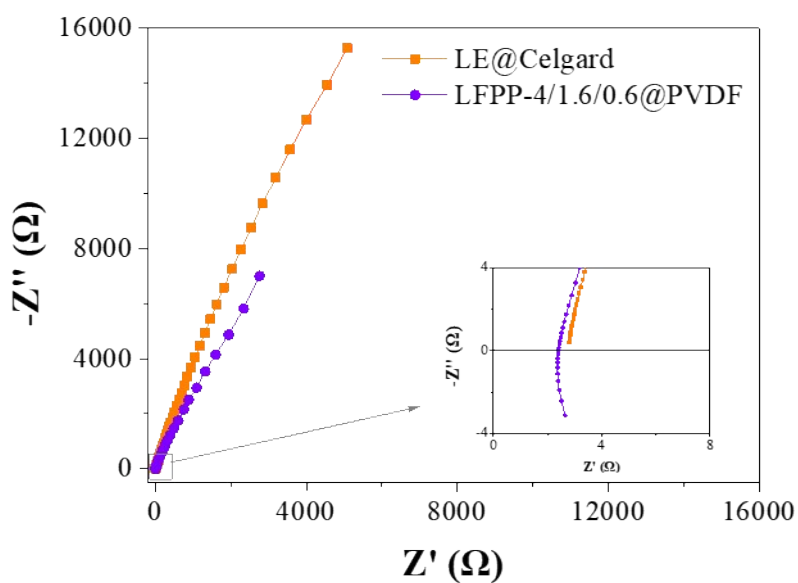

Fig. S4 EIS curves of SS|LE@Celgard|SS and SS|LFPP-4/1.6/0.6|SS cells at 30 °C.

Table S1 Calculation result of ionic conductivity of LFPP-4/2/1@PVDF SIPE and PP with liquid electrolyte

|                          | Thickness ( $\mu\text{m}$ ) | R ( $\Omega$ ) | $\sigma(\text{mS cm}^{-1})$ |
|--------------------------|-----------------------------|----------------|-----------------------------|
| LFPP-4/1.6/0.6@PVDF SIPE | 252                         | 2.17           | 5.81                        |
| LE@Celgard               | 25                          | 2.8            | 0.47                        |

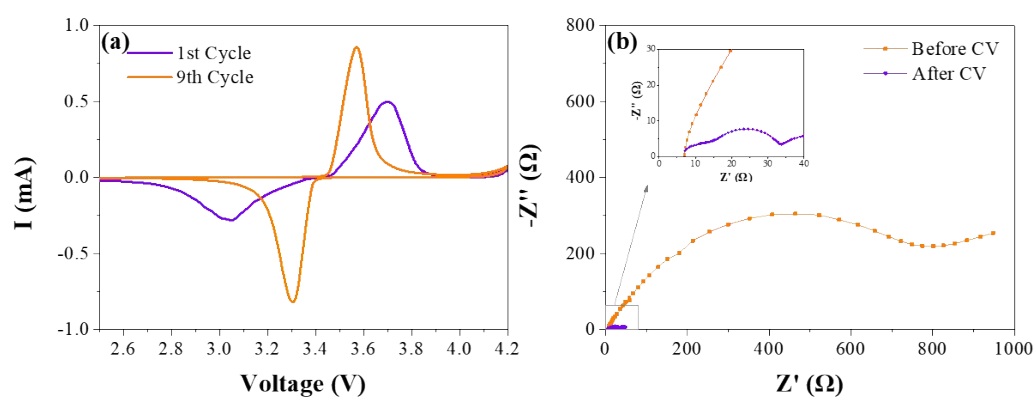

Fig. S5 The initial and 9th cycles of cyclic voltammetry curves (left) and EIS curves of the Li|LFPP-4/2/1@PVDF SIPE|LFP battery.

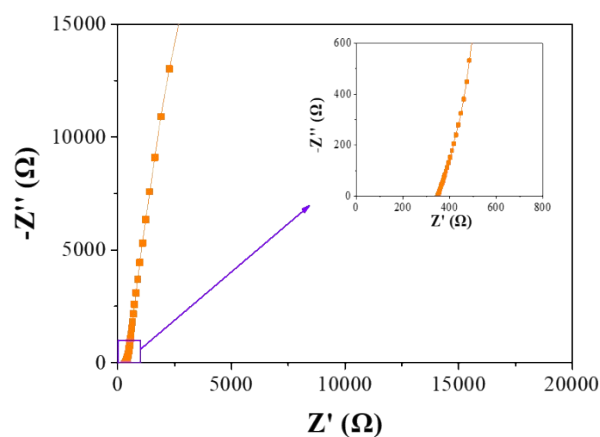

Fig. S6 The EIS curve of the LFPP-4/1.6/0.6 SIPE in an electrolytic tank with platinum plate electrodes as working electrode and opposite electrode.

Table S2 Calculation result of ionic conductivity of LFPP-4/2/1@PVDF SIPE with platinum plate electrodes as working electrode and opposite electrode.

|                          | L (mm) | S (cm <sup>2</sup> ) | R (Ω) | σ (mS cm <sup>-1</sup> ) |
|--------------------------|--------|----------------------|-------|--------------------------|
| LFPP-4/1.6/0.6@PVDF SIPE | 12.0   | 0.4                  | 348   | 8.62                     |
